# Supplementary figures and images for: On the Pathogenicity of Autoantigen-Specific T-Cell Receptors
Source: Oxford University Press journal article supplement (doi:10.2337/db07-1129), 2008-02-26

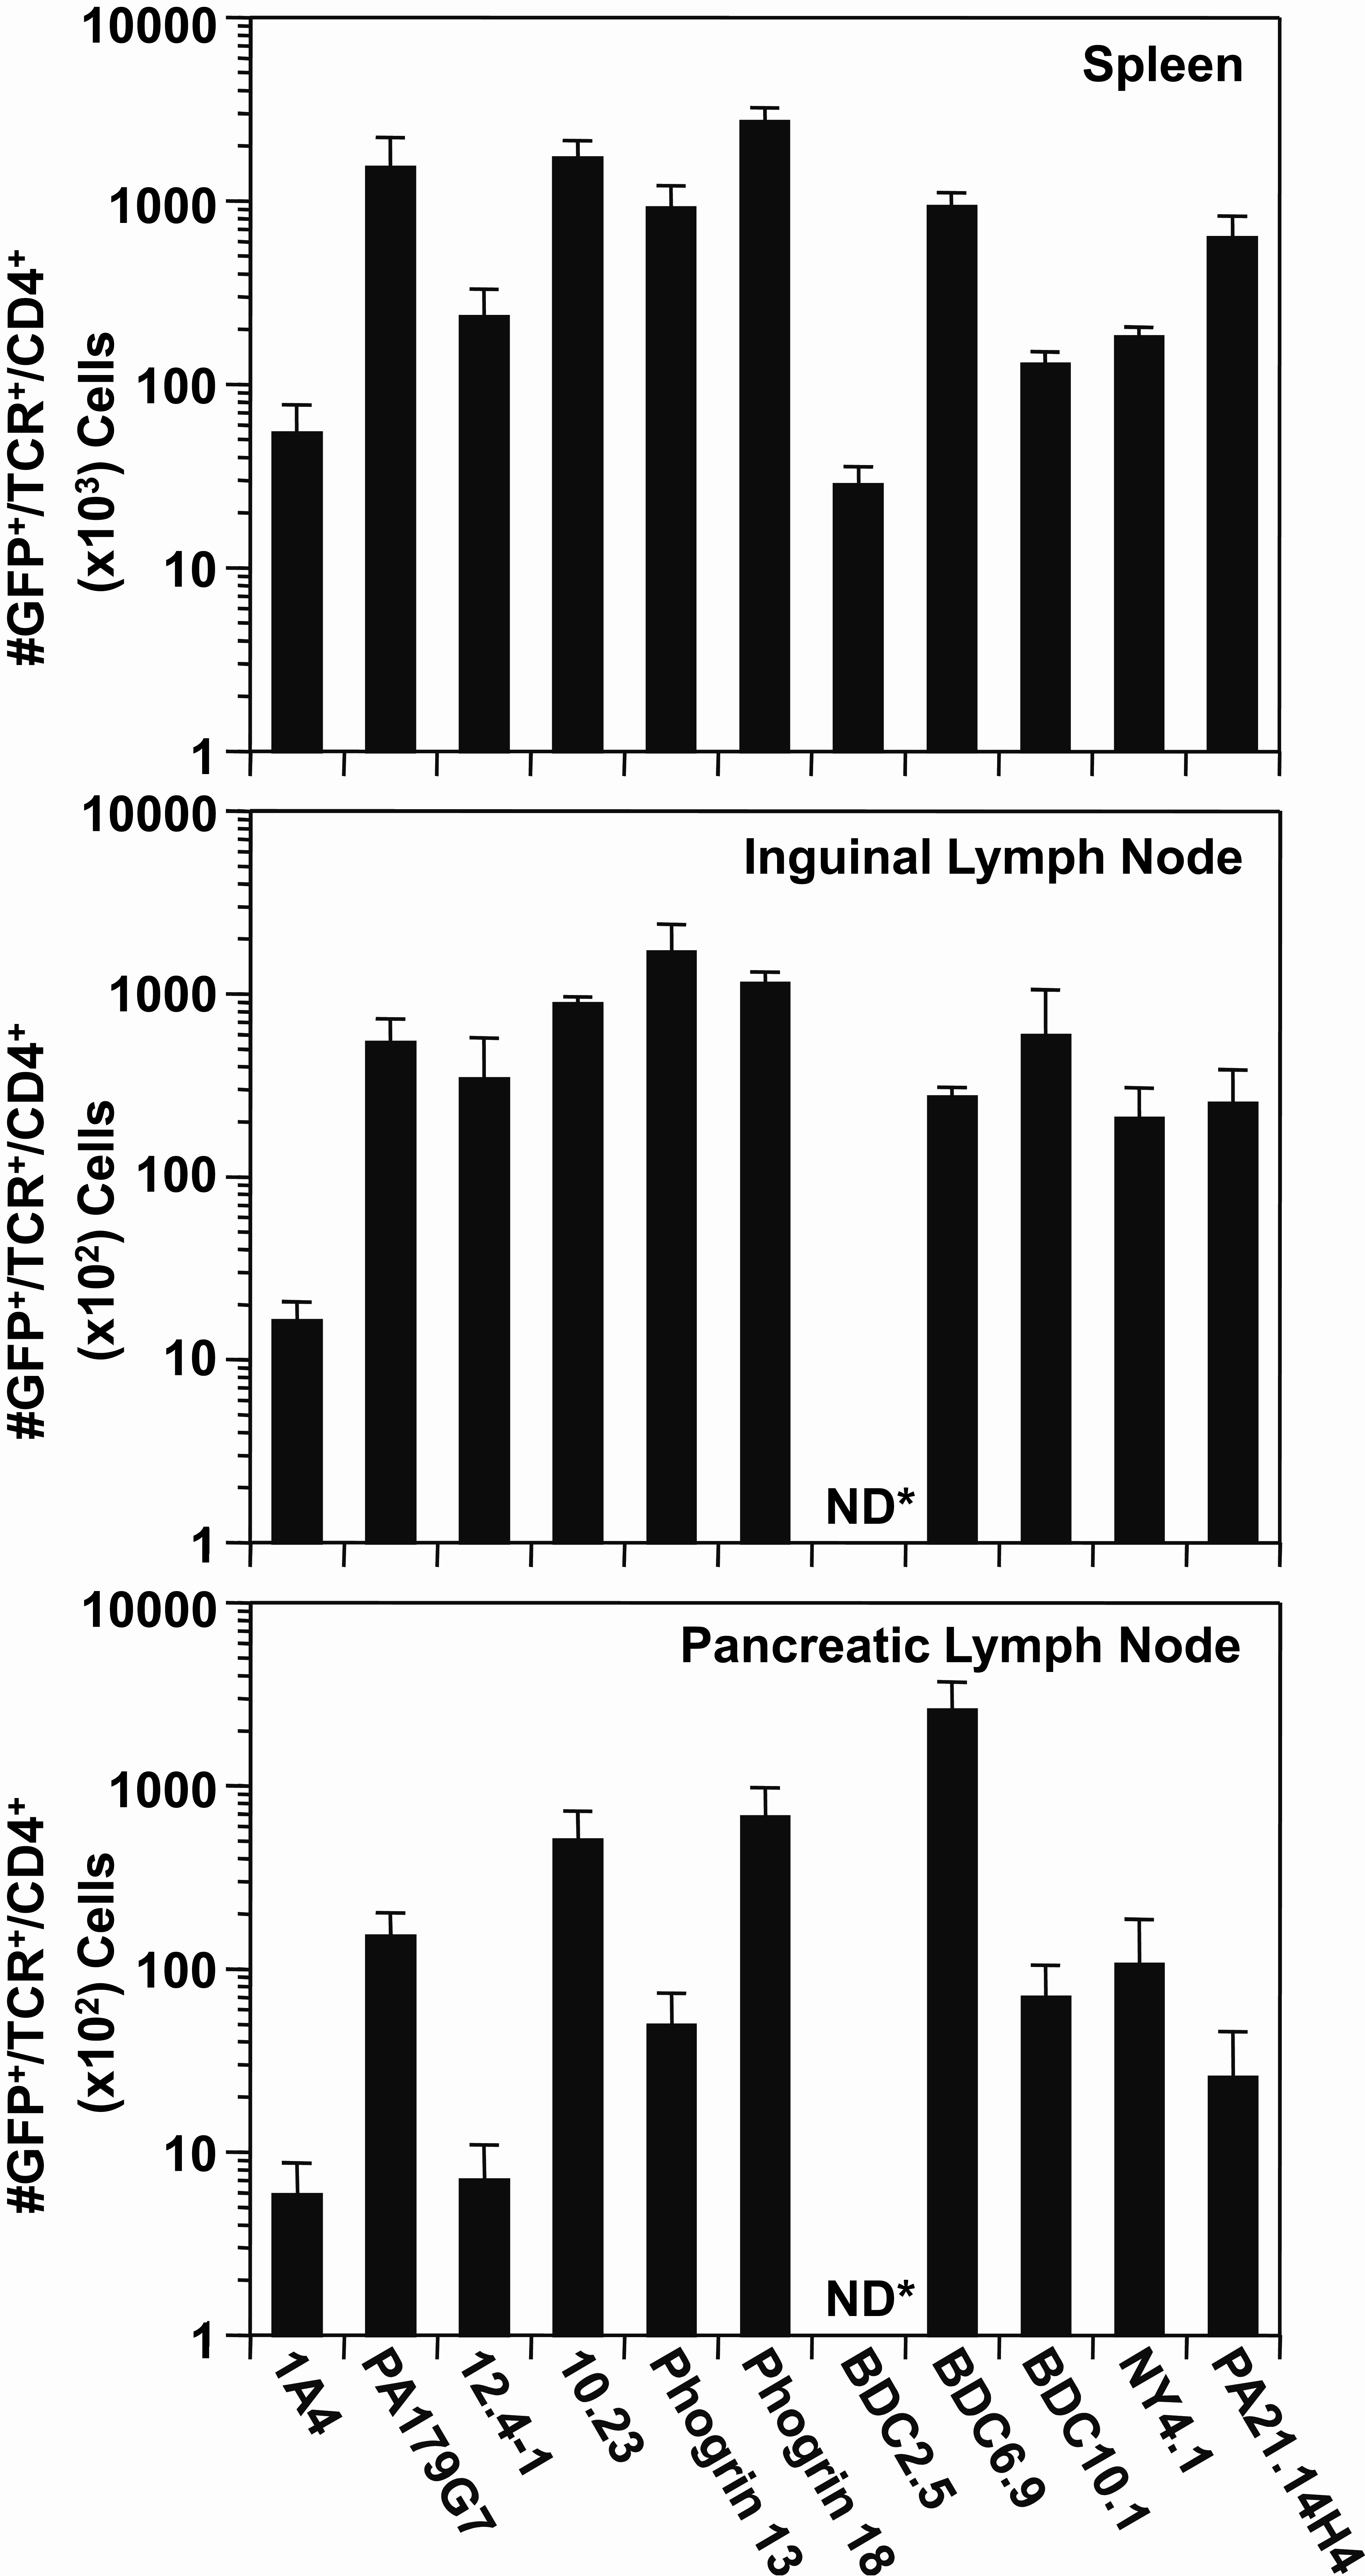


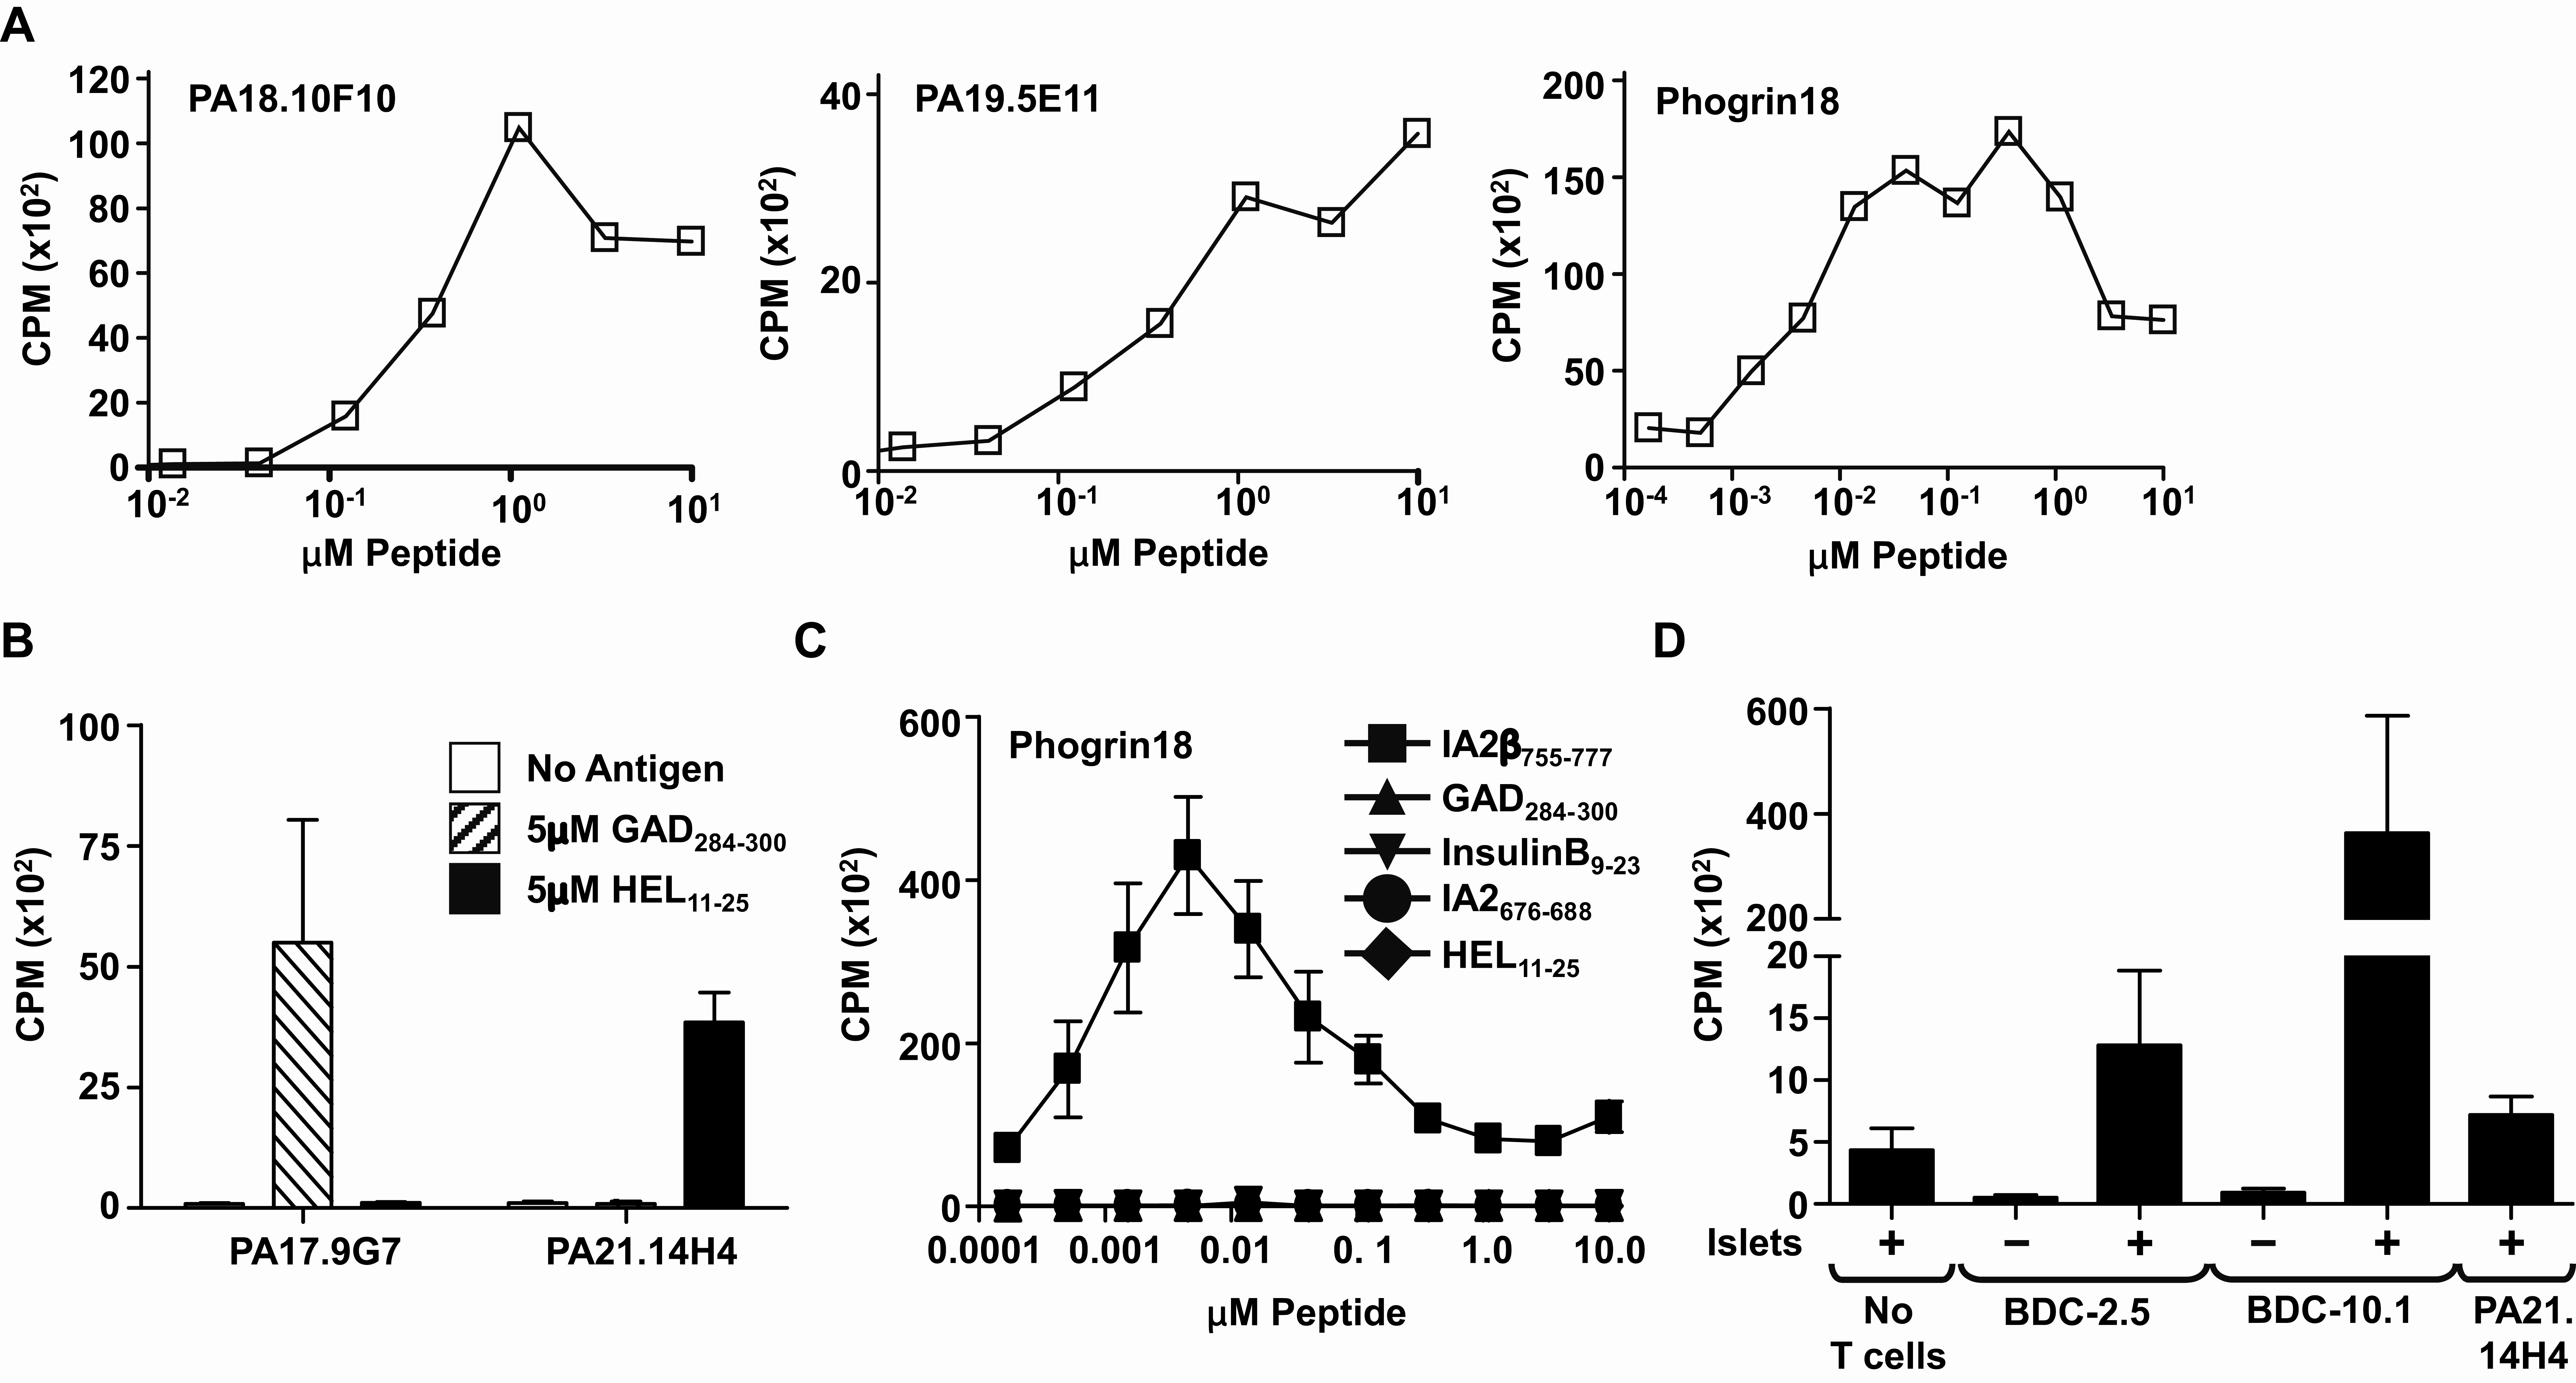


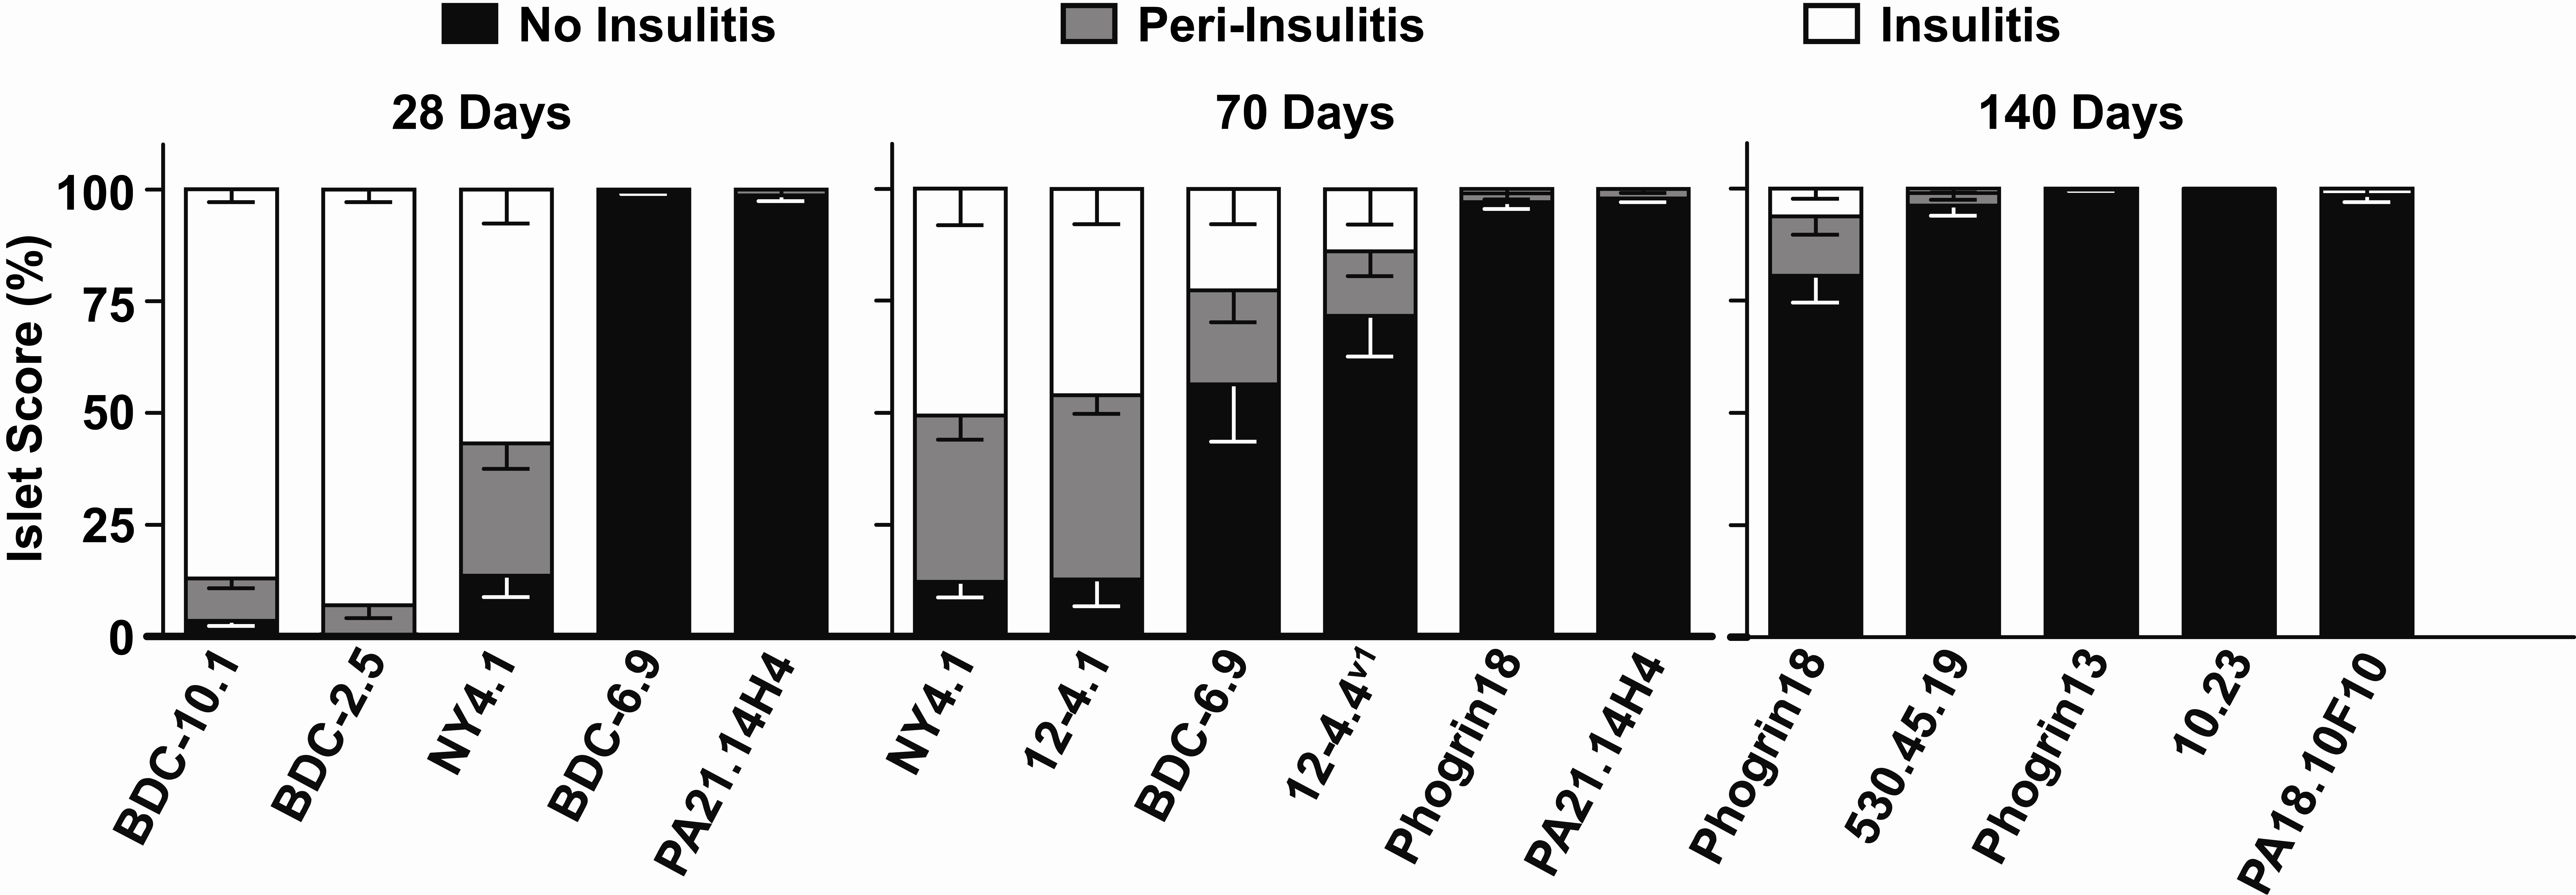

Supplement: db071129figures.doc [file db071129figures.doc]
